# Supplementary material for: Cu(ii) immobilized on poly(guanidine-sulfonamide)-functionalized Bentonite@MgFe2O4: a novel magnetic nanocatalyst for the synthesis of 1,4-dihydropyrano[2,3-c]pyrazole
Source: Royal Society of Chemistry journal article supplement (doi:10.1039/d3ra00049d), 2023-01-01
Supplement: d3ra00049d1.pdf [file d3ra00049d1.pdf]

## Supporting Information

### **Cu(II) immobilized on poly (guanidine-sulfonamide) functionalized MgFe<sub>2</sub>O<sub>4</sub>@Bentonite: a novel magnetic nanocatalyst for the synthesis of 1,4-dihydropyrano[2,3-c]pyrazole**

Sedigheh Alavinia, Ramin Ghorbani-Vaghei\*, Ramin Ghiai, Alireza Gharakhani,  
Department of Organic Chemistry, Faculty of Chemistry, Bu-Ali Sina University, Hamedan,  
6517838683, Iran

\*Corresponding author; E-mail: [rgvaghei@yahoo.com](mailto:rgvaghei@yahoo.com) & [ghorbani@basu.ac.ir](mailto:ghorbani@basu.ac.ir)

Fax: +98(81)38380647

## General procedure for the synthesis of substituted 1,4-dihydropyrano[2,3-c]pyrazole derivatives

Benzaldehyde (1 mmol), malononitrile (1 mmol), ethyl acetoacetate (1 mmol), hydrazine hydrate (1 mmol), and Bentonite@MgFe<sub>2</sub>O<sub>4</sub>@PGSA/Cu (10 mg) was stirred in water solvent at room temperature. After completion of the reaction (monitored by TLC), Bentonite@MgFe<sub>2</sub>O<sub>4</sub>@PGSA/Cu catalyst was isolated by external magnet, washed with EtOH and EtOAc (2 × 5 mL) and dried under vacuum. The title compounds were obtained in their crystalline forms by recrystallization of ethanol solution (Scheme 1).

### Spectral data for products.

#### 6-Amino-4-(2-hydroxy-3-methoxy)-3-methyl-1,4-dihydropyrano[2,3-c]pyrazole-5-carbonitrile

white solid; IR (KBr) ( $\nu_{\max}$ , cm<sup>-1</sup>) 3468-3382, 3185, 2185, 3300-3500; <sup>1</sup>H NMR (400 MHz, CDCl<sub>3</sub>-d<sub>6</sub>):  $\delta$  (ppm) 1.96 (3H, s), 3.79 (3H, s), 4.60 (1H, s), 6.55-6.97 (5H, m), 10.39 (2H, br); <sup>13</sup>C NMR (75 MHz, CDCl<sub>3</sub>-d<sub>6</sub>)  $\delta$ (ppm): 10.35, 29.26, 56.04, 105.43, 110.56, 120.53, 121.31, 124.34, 124.76, 136.95, 138.35, 147.16, 159.55, 160.51.

#### 6-Amino-3-methyl-4-(naphthalene-1-yl)-1,4-dihydropyrano[2,3-c]pyrazole-5-carbonitrile

white solid; IR (KBr) ( $\nu_{\max}$ , cm<sup>-1</sup>) 3375, 3310, 3156, 2191; <sup>1</sup>H NMR (400 MHz, CDCl<sub>3</sub>-d<sub>6</sub>):  $\delta$  (ppm) 1.76 (3H, s), 4.78 (1H, s), 6.92-6.95 (2H, s), 7.23-7.91 (7H, m), 12.16 (1H, s); <sup>13</sup>C NMR (75 MHz, CDCl<sub>3</sub>-d<sub>6</sub>)  $\delta$ (ppm): 10.18, 36.97, 57.56, 97.85, 121.26, 126.16, 126.21, 126.29, 126.70, 128.00, 128.14, 128.85, 132.59, 133.28, 136.29, 142.16, 155.29, 161.39

#### 6-Amino-4-(4-Bisphenyl)-3-methyl-1,4-dihydropyrano[2,3-c]pyrazole-5-carbonitrile

white solid; IR (KBr) ( $\nu_{\max}$ , cm<sup>-1</sup>): 3391, 3367, 3167, 2187; <sup>1</sup>H-NMR: (CDCl<sub>3</sub>-d<sub>6</sub>)  $\delta$ (ppm) = 1.84 (3H, s), 4.66 (1H, s), 6.91 (2H, s), 7.25-7.67 (9H, m), 12.13 (1H, s)

<sup>13</sup>C-NMR: (CDCl<sub>3</sub>-d<sub>6</sub>)  $\delta$ (ppm) = 10.29, 36.32, 57.52, 98.01, 121.32, 127.03, 127.24, 127.80, 128.50, 129.37, 136.10, 139.01, 140.27, 144.21, 155.25, 161.40

#### 6-Amino-4-(4-fluorophenyl)-3-methyl-1,4-dihydropyrano[2,3-c]pyrazole-5-carbonitrile

white solid; IR (KBr) ( $\nu_{\max}$ ,  $\text{cm}^{-1}$ ):3360,3233,3119,2195 ; $^1\text{H-NMR}$ : ( $\text{CDCl}_3\text{-d}_6$ )  $\delta$ (ppm) 1.78(3H, s), 4.63 (1H, s), 6.89 (2H, s), 7.11-7.22 (4H, m),12.12 (H, s)

**6-Amino-4-(3-nitrophenyl)-1,4- dihydropyrano[2,3,c]pyrazole-5-carbonitrile**

white solid; IR (KBr) ( $\nu_{\max}$ ,  $\text{cm}^{-1}$ ) 3474,3117,3223,2195  $\text{cm}^{-1}$ ;  $^1\text{H NMR}$  (400 MHz,  $\text{CDCl}_3\text{-d}_6$ )  $\delta$  (ppm): 1.81 (3H,s), 4.88 (1H,s), 7.06 (2H,s), 7.68-8.03(4H,m), 12.21 (1H,s)

**6-Amino-4-(3-bromophenyl)-3-methyl-1,4- dihydropyrano[2,3,c]pyrazole-5-carbonitrile**

White solid; IR (KBr) ( $\nu_{\max}$ ,  $\text{cm}^{-1}$ ) 3410,3320,3194,2191  $\text{cm}^{-1}$ ;  $^1\text{H NMR}$  (400 MHz,  $\text{CDCl}_3$ ):  $\delta$  (ppm) 1.82 (3H, $\text{CH}_3$ , s), 4.66 (1H, s), 6.99-7.41 (6H,ArH, m), 12.17(1H,NH, s)

**6-Amino-4-(furan-2-yl)-3-methyl-1,4- dihydropyrano[2,3,c]pyrazole-5-carbonitrile**

Yellow solid; IR (KBr) ( $\nu_{\max}$ ,  $\text{cm}^{-1}$ ) 3419,3323,3055,2172  $\text{cm}^{-1}$ ;  $^1\text{H NMR}$  (400 MHz,  $\text{CDCl}_3\text{-d}_6$ ):  $\delta$ (ppm) 2.16 (3H, $\text{CH}_3$ , s), 4.96 (1H, s), 6.36-7.71 (5H,  $\text{NH}_2$ ,m), 12.53 (1H,NH, s)

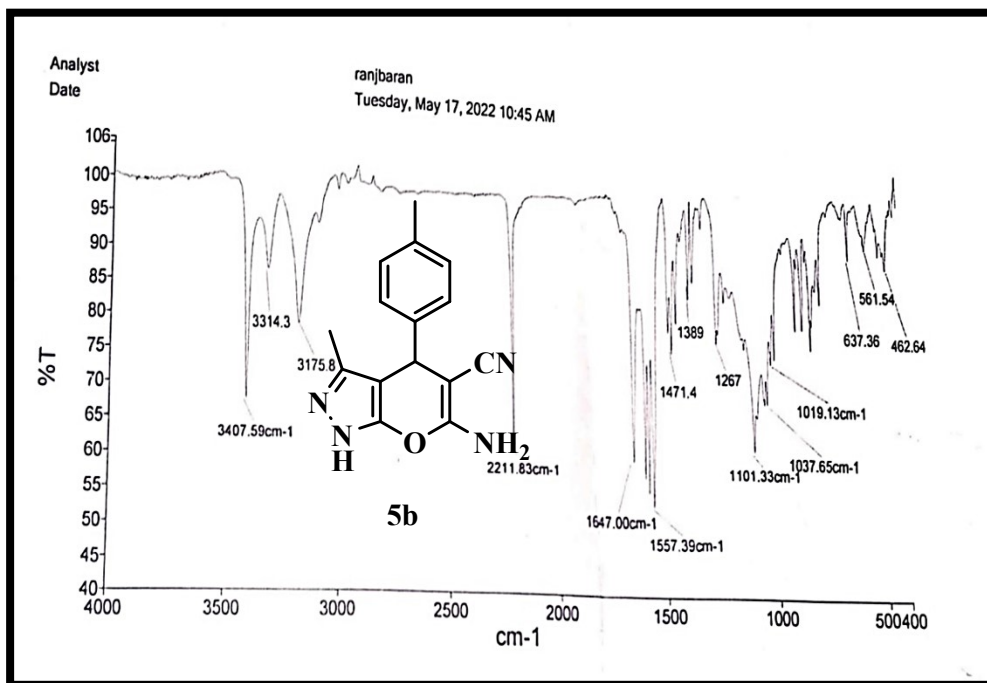

FT-IR spectra of compound 5b

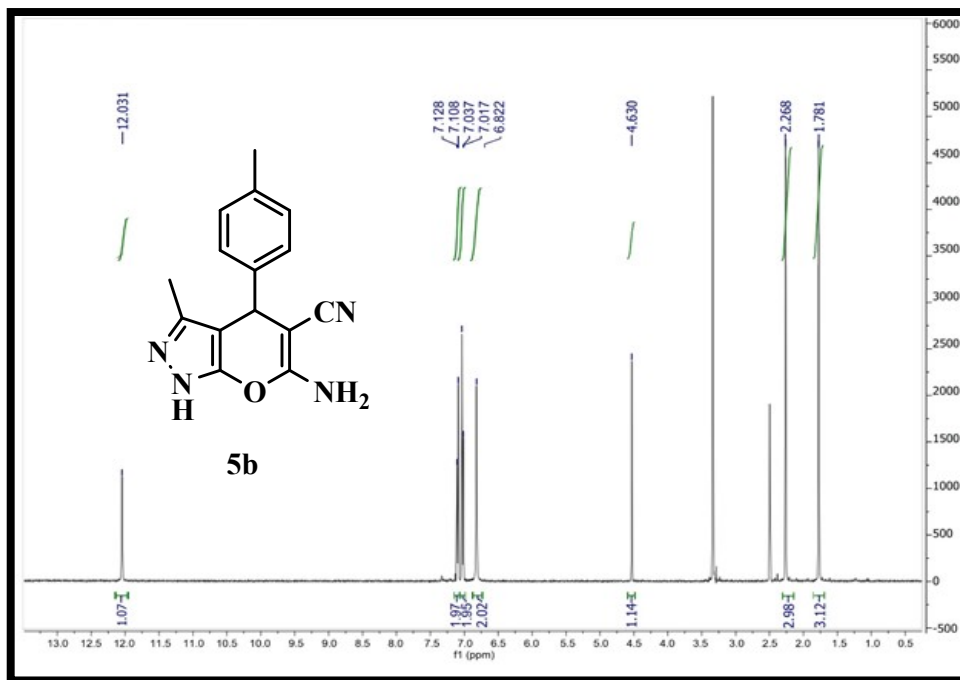

<sup>1</sup>H NMR spectra of compound 5b

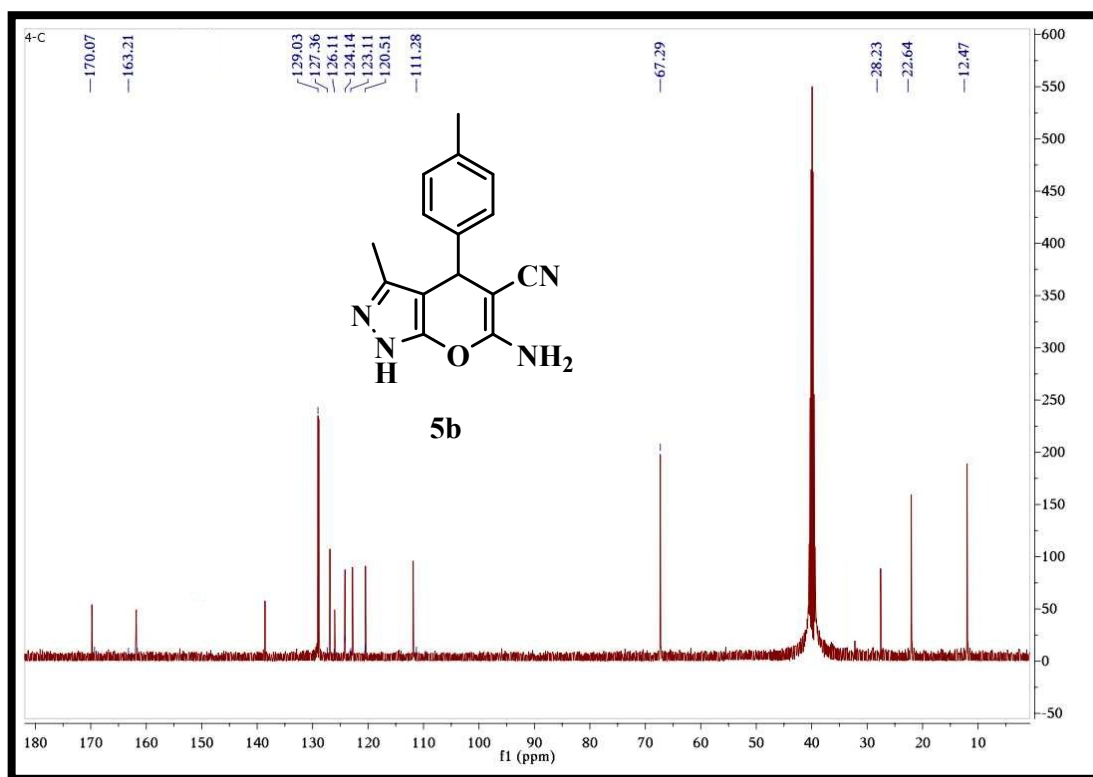

<sup>13</sup>C NMR spectra of compound 5b

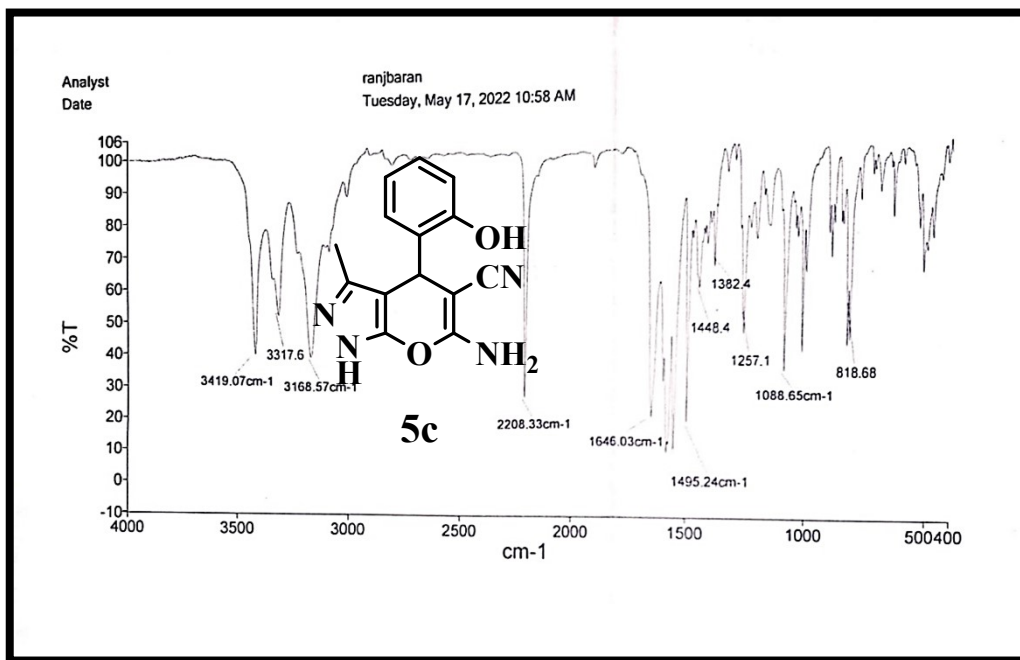

FT-IR spectra of compound 5c

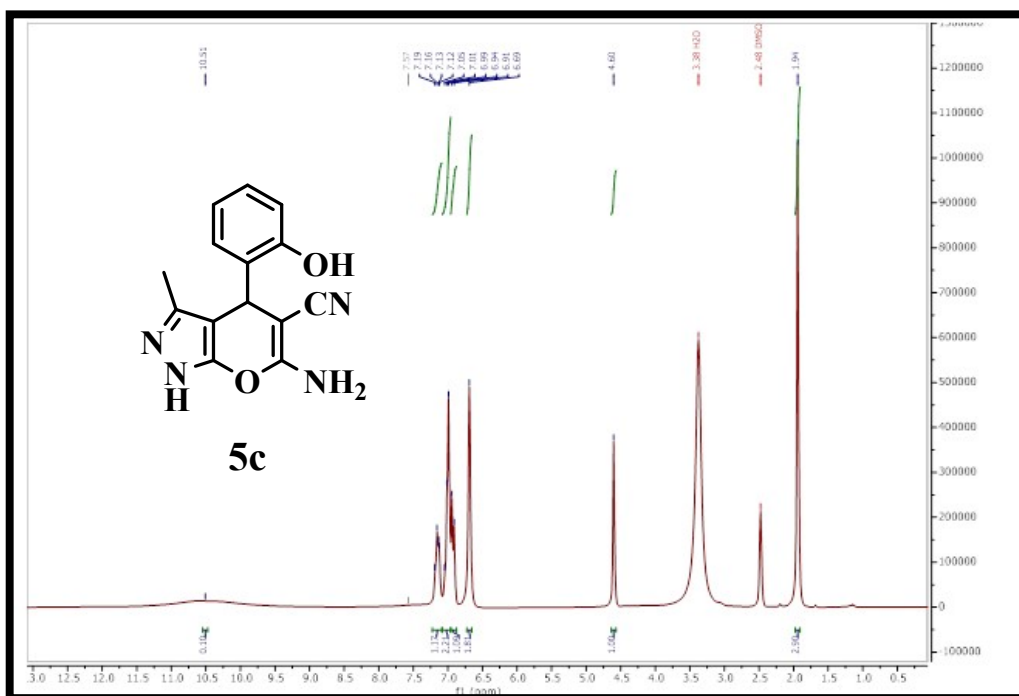

<sup>1</sup>H NMR spectra of compound 5c

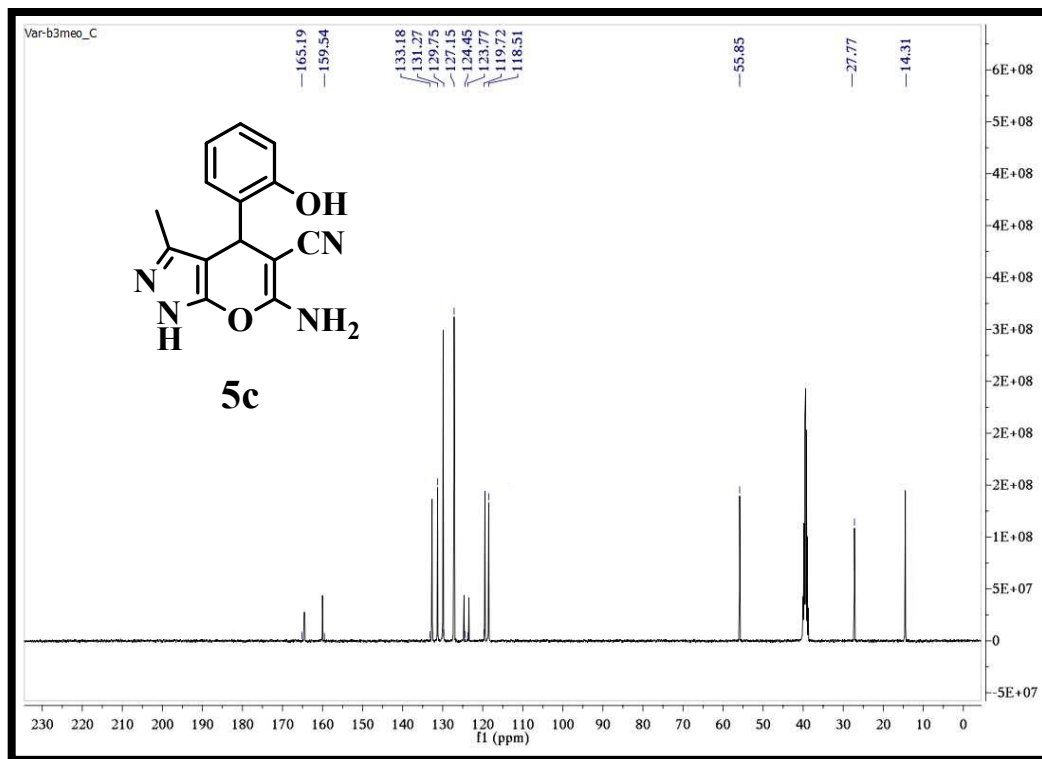

<sup>13</sup>C NMR spectra of compound **5c**

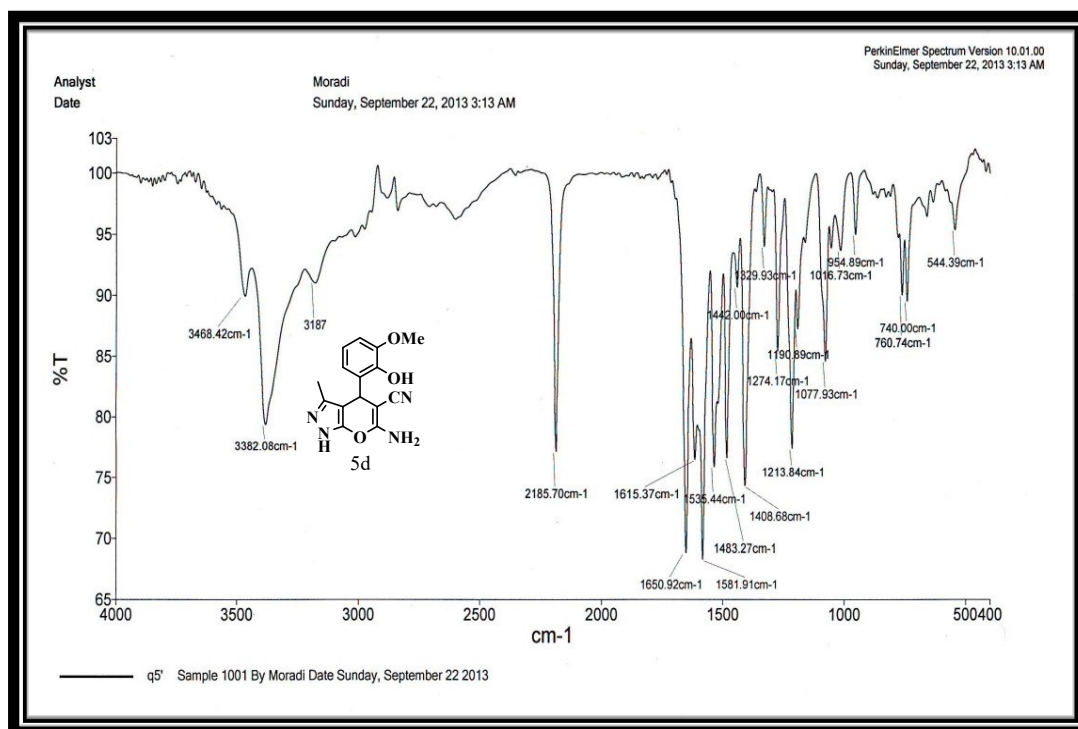

FT-IR spectra of compound **5d**

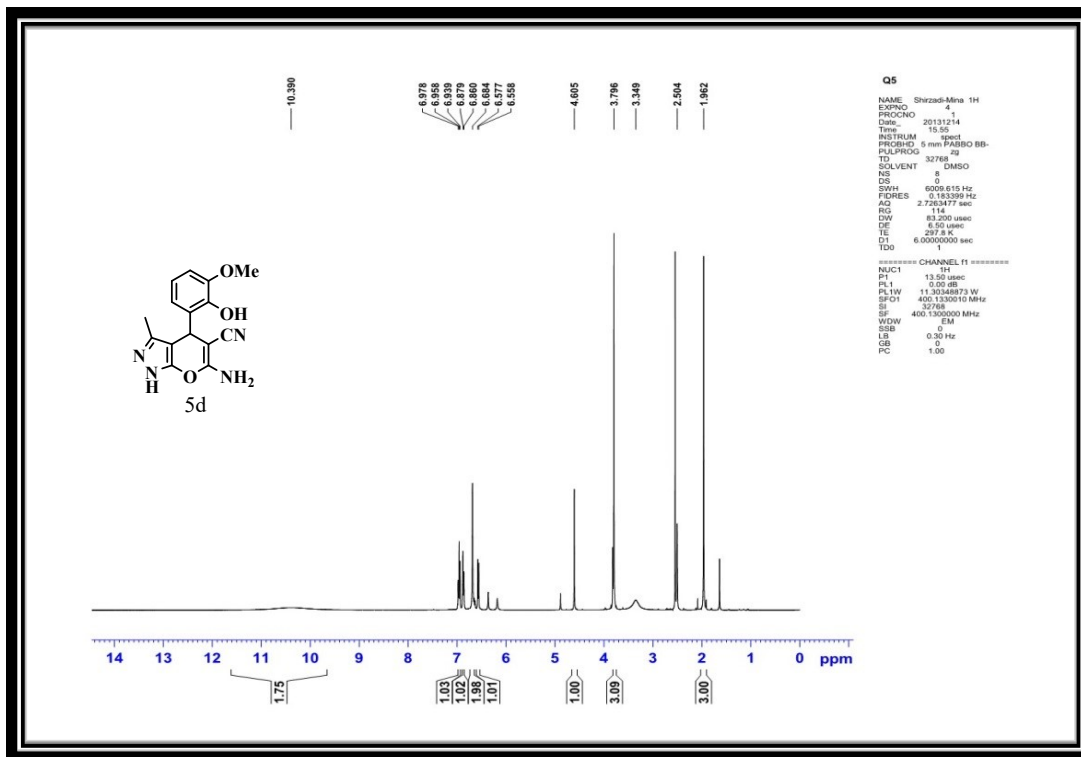

<sup>1</sup>H NMR spectra of compound 5d

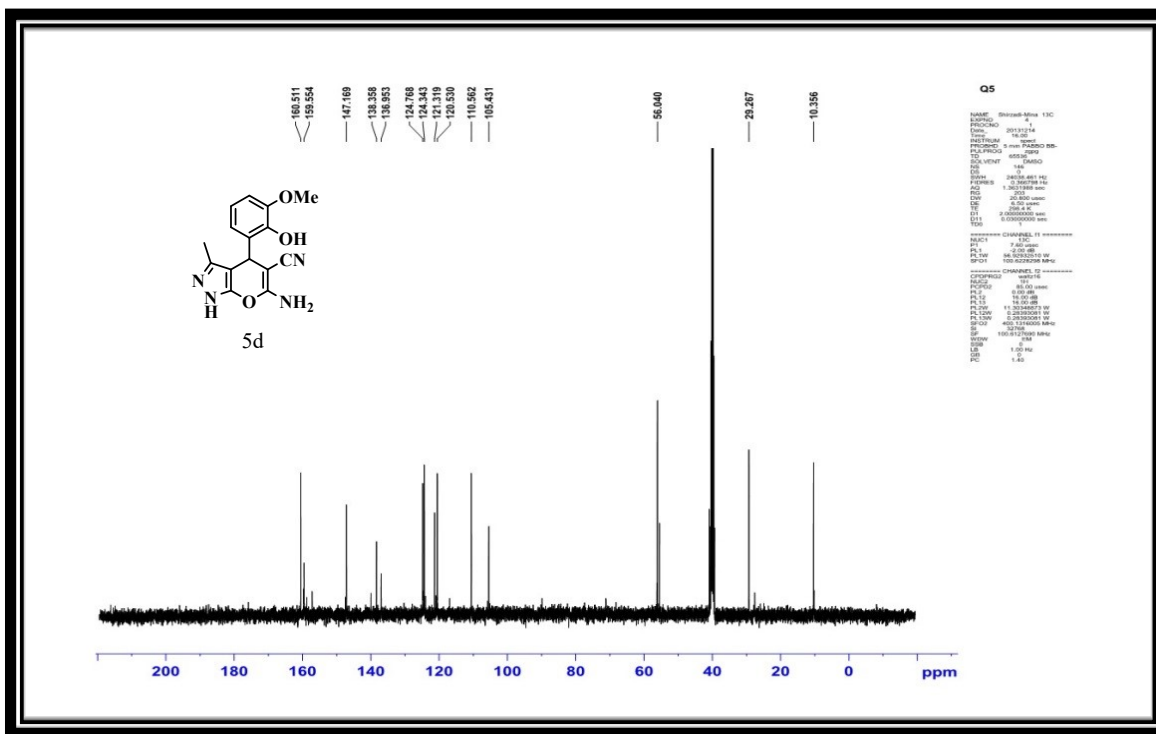

<sup>13</sup>C NMR spectra of compound 5d



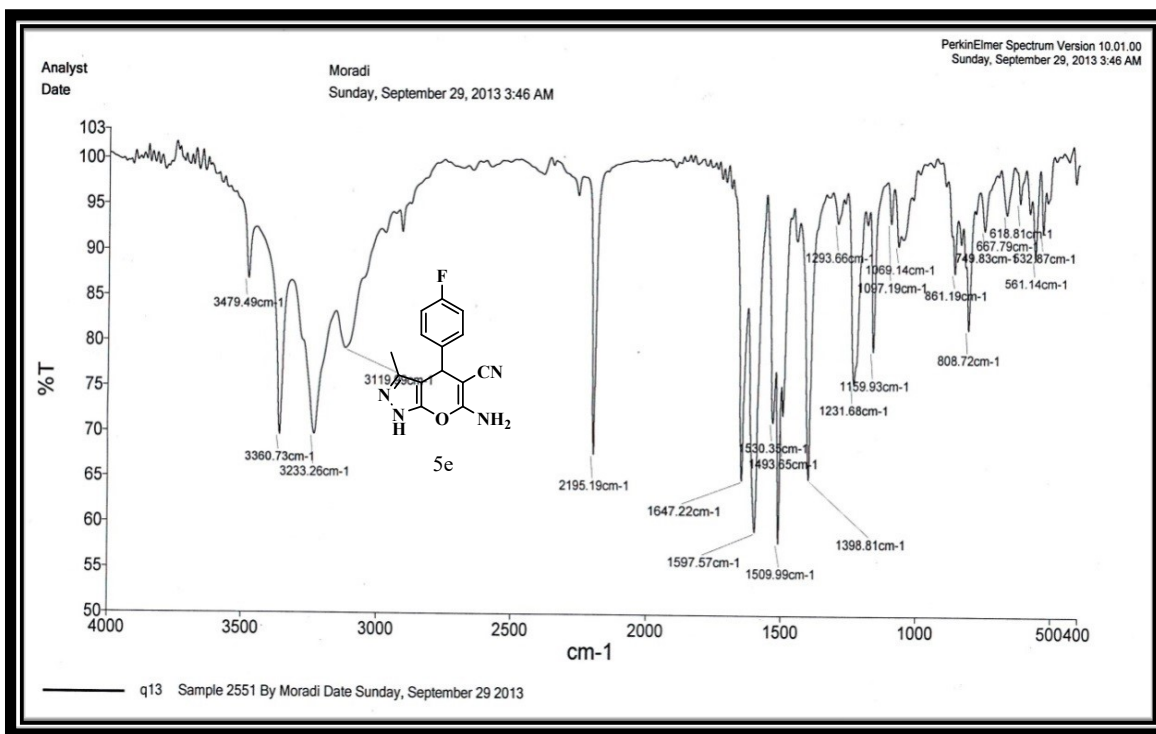

FT-IR spectra of compound 5e

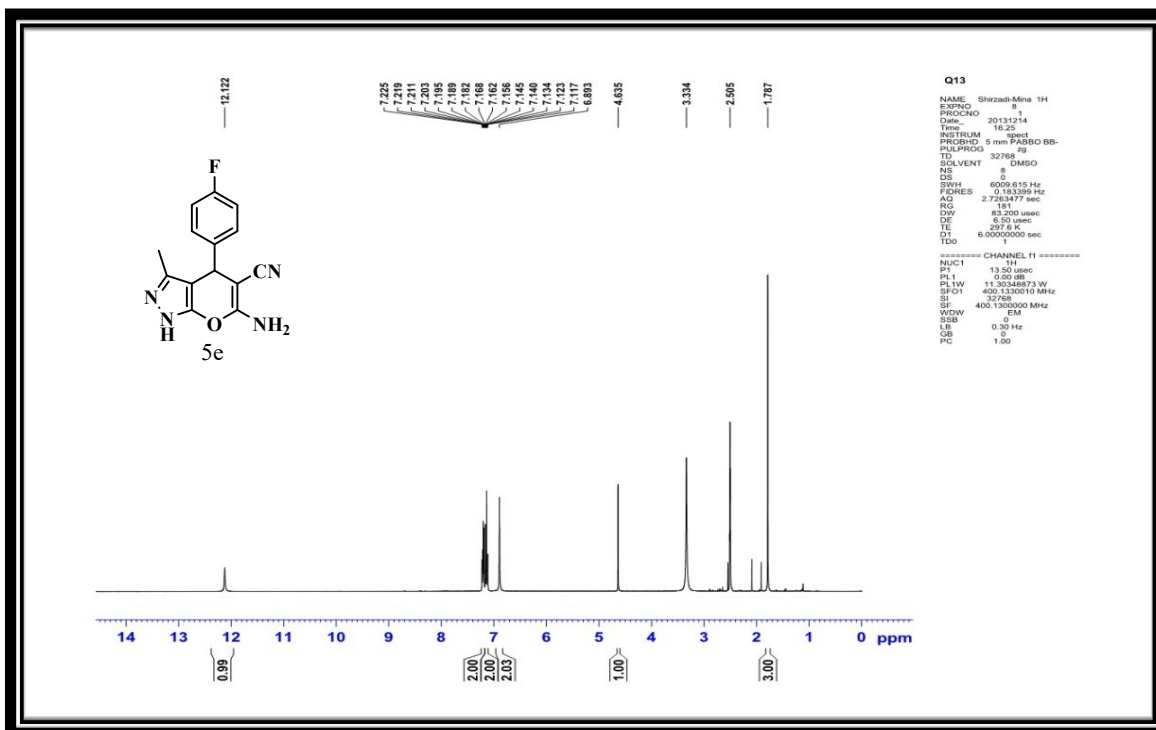

<sup>1</sup>H NMR spectra of compound 5e

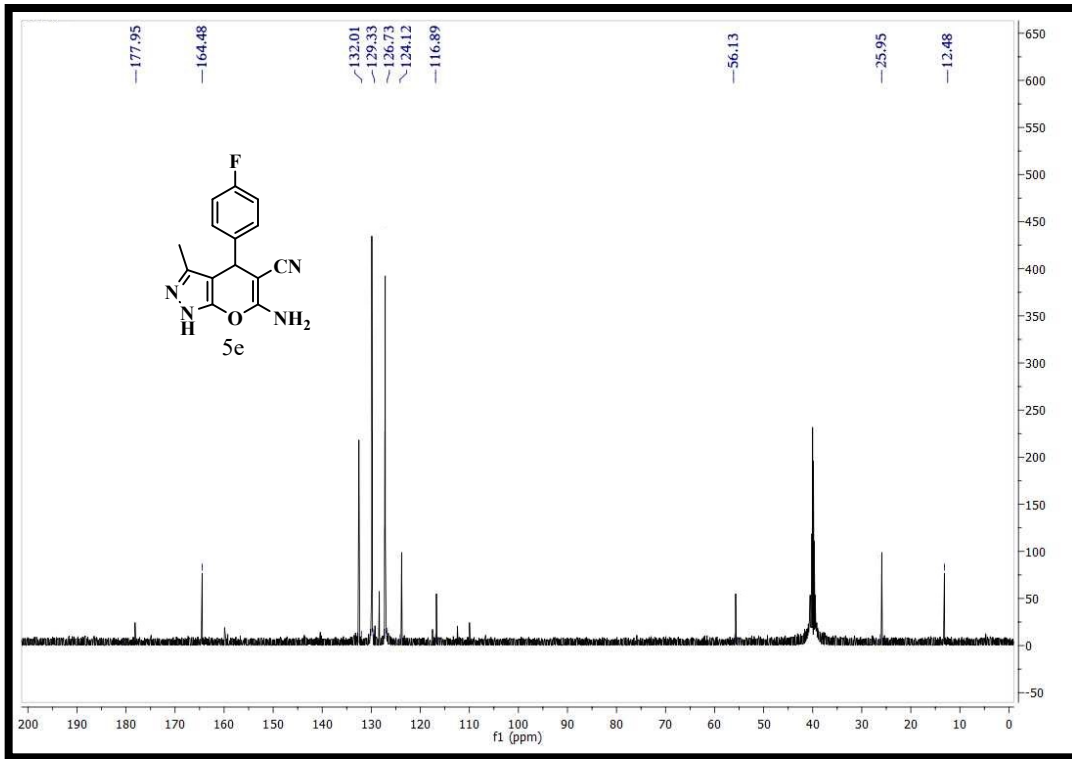

<sup>13</sup>C NMR spectra of compound 5e

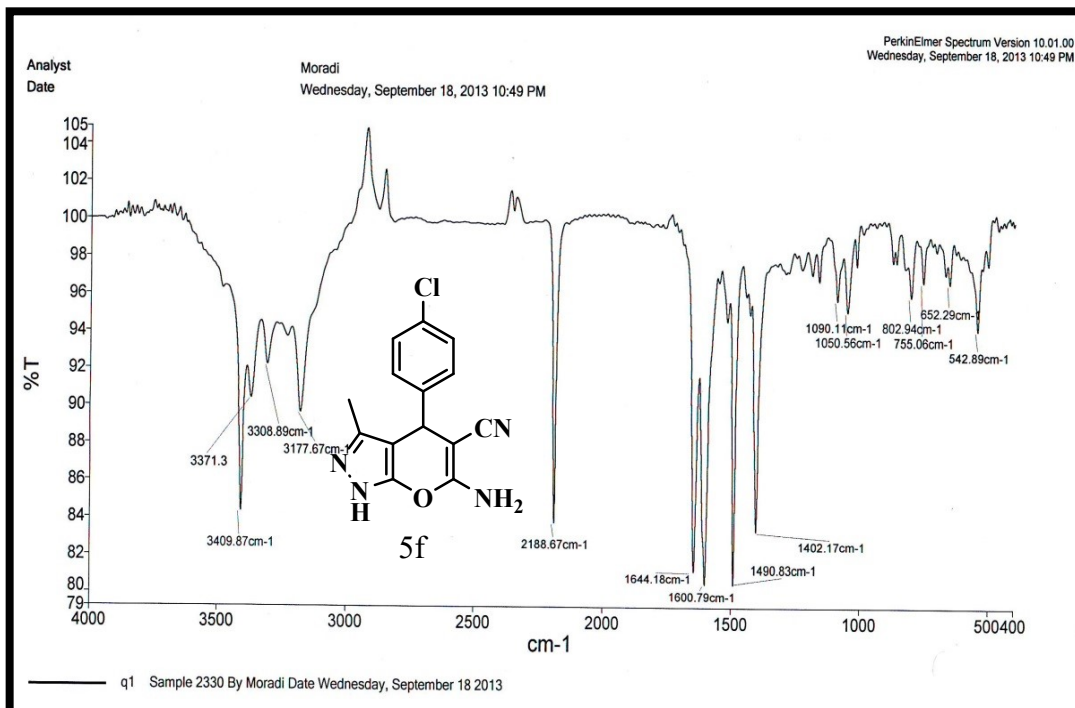

FT-IR spectra of compound 5f

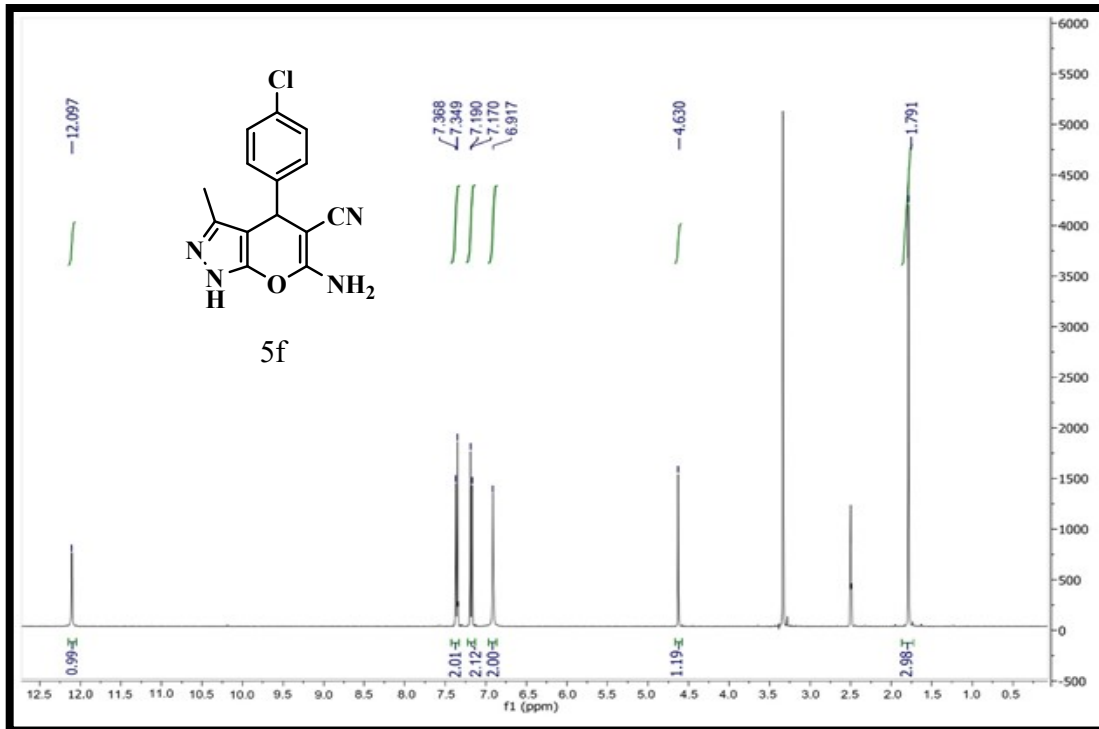

<sup>1</sup>H NMR spectra of compound 5f

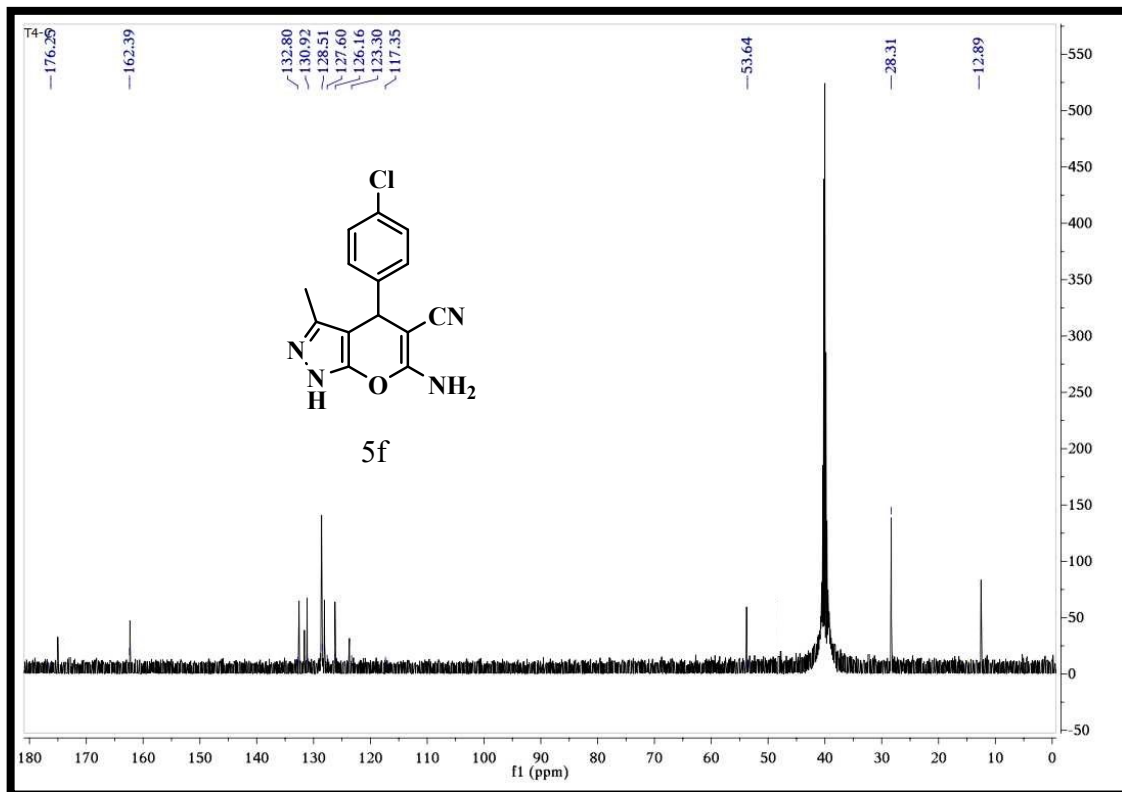

### <sup>13</sup>CNMR spectra of compound 5f

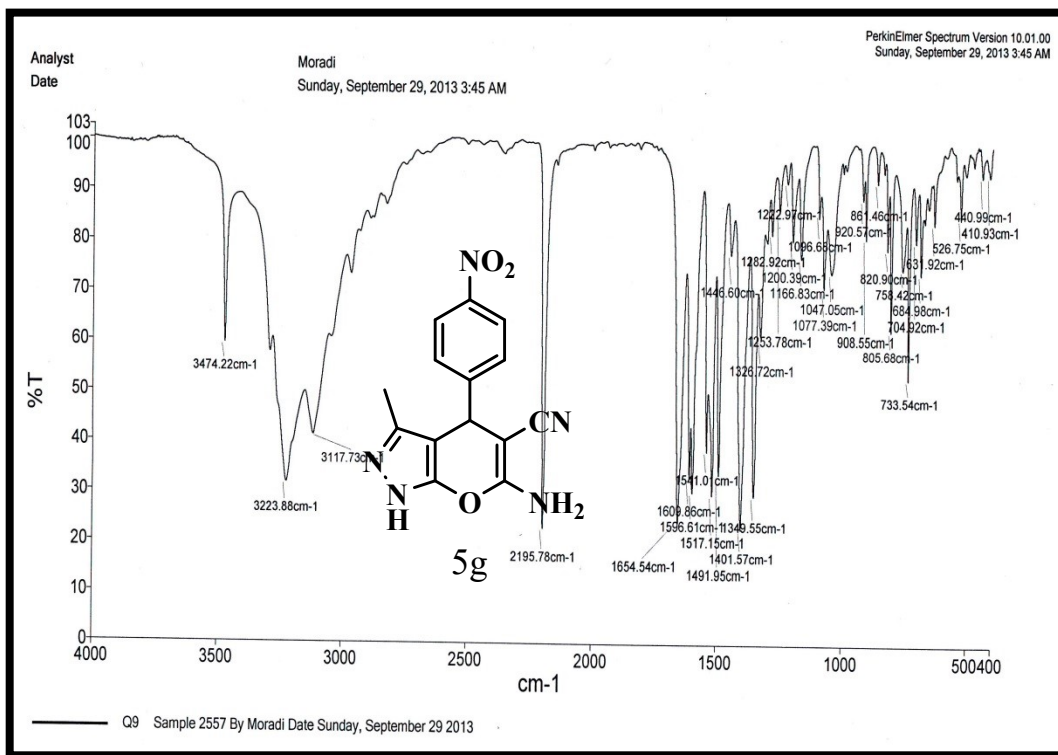

### FT-IR spectra of compound 5g

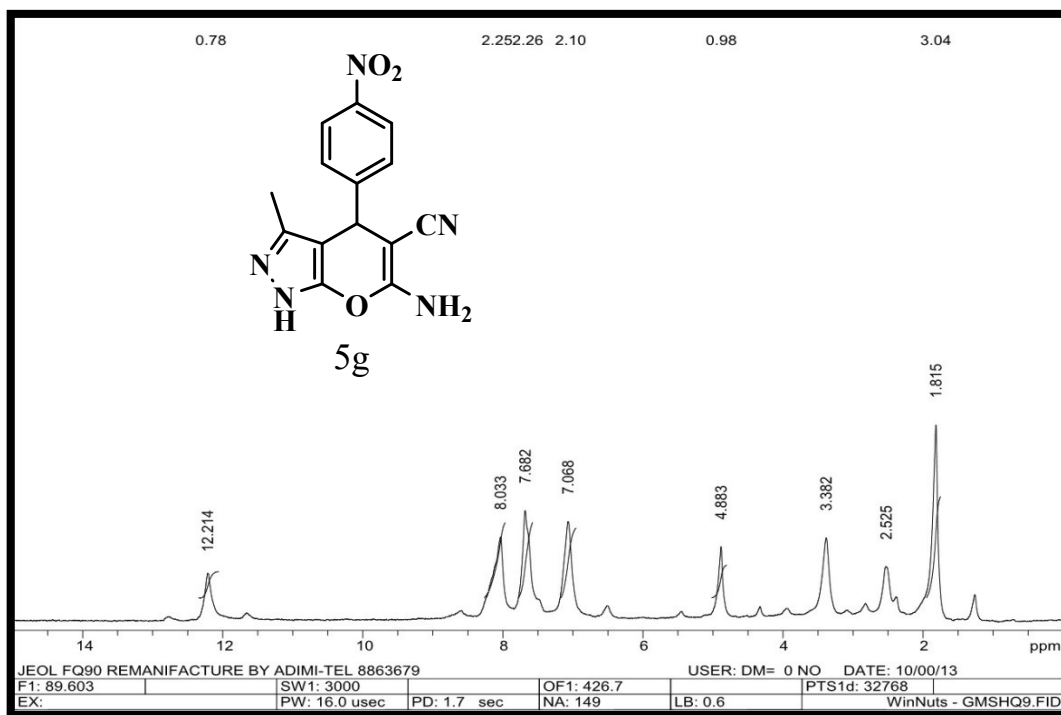

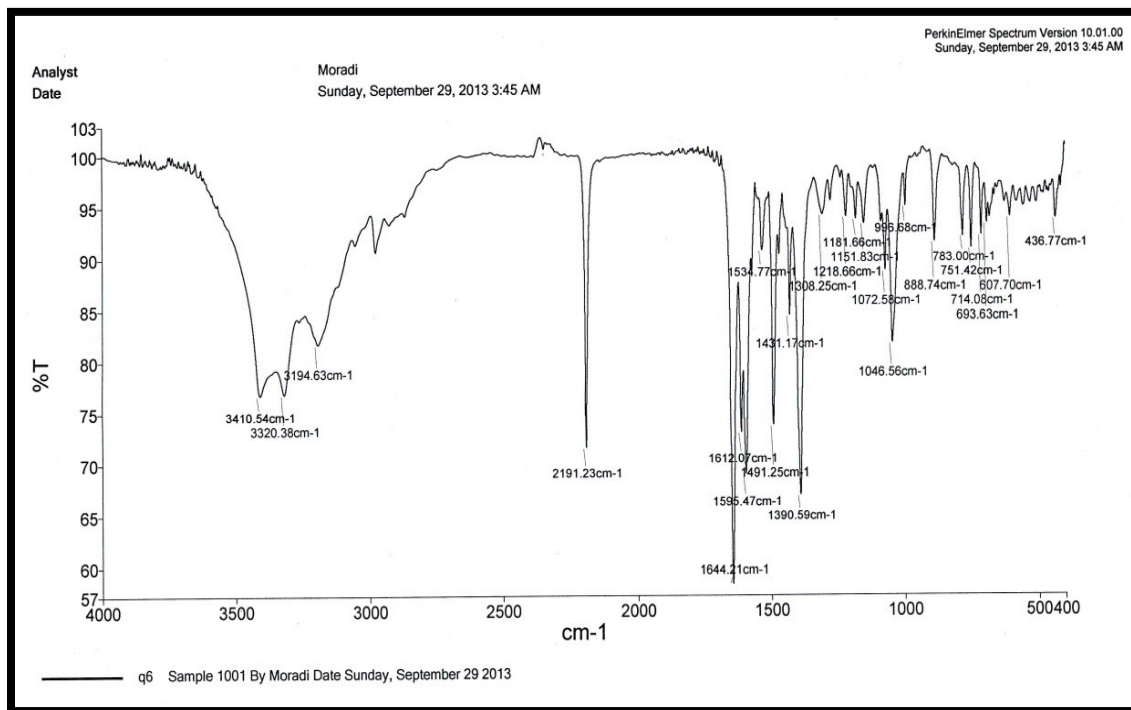

**<sup>1</sup>H NMR  
R  
spectra  
of  
compound  
5g**

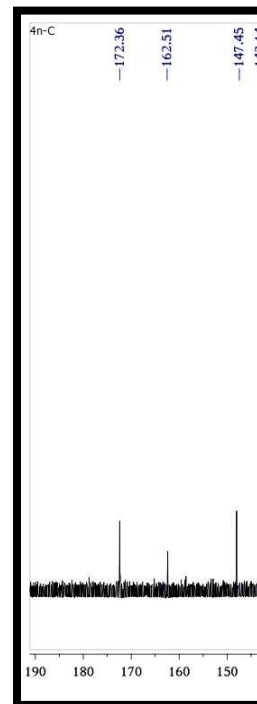

**<sup>13</sup>C NMR spectra of compound 5g**



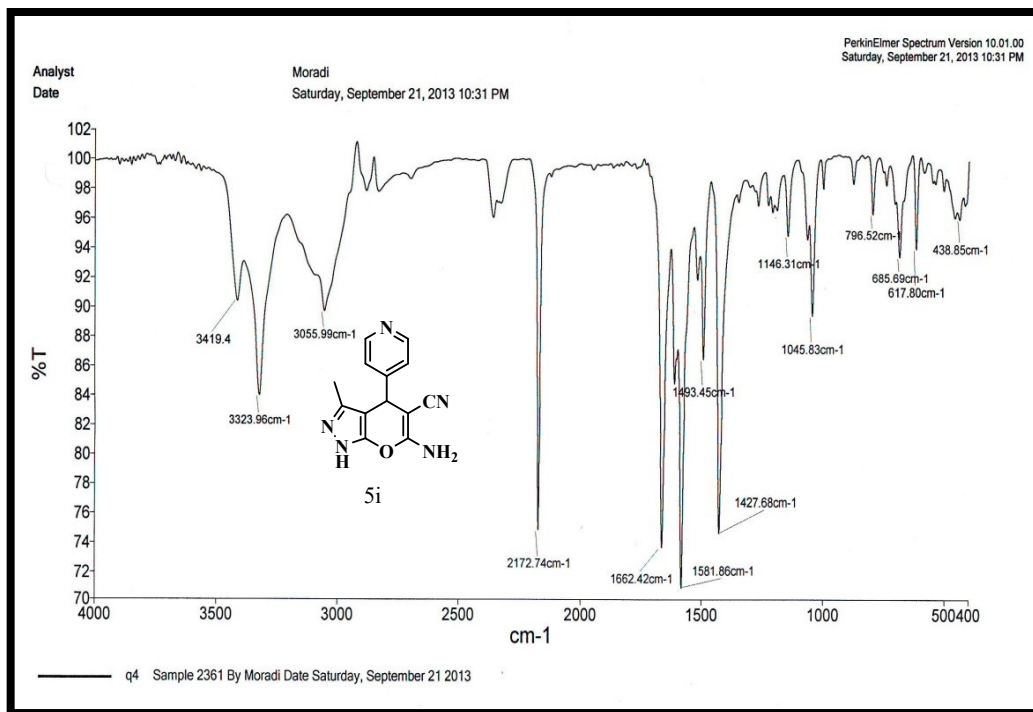

FT-IR spectra of compound 5i

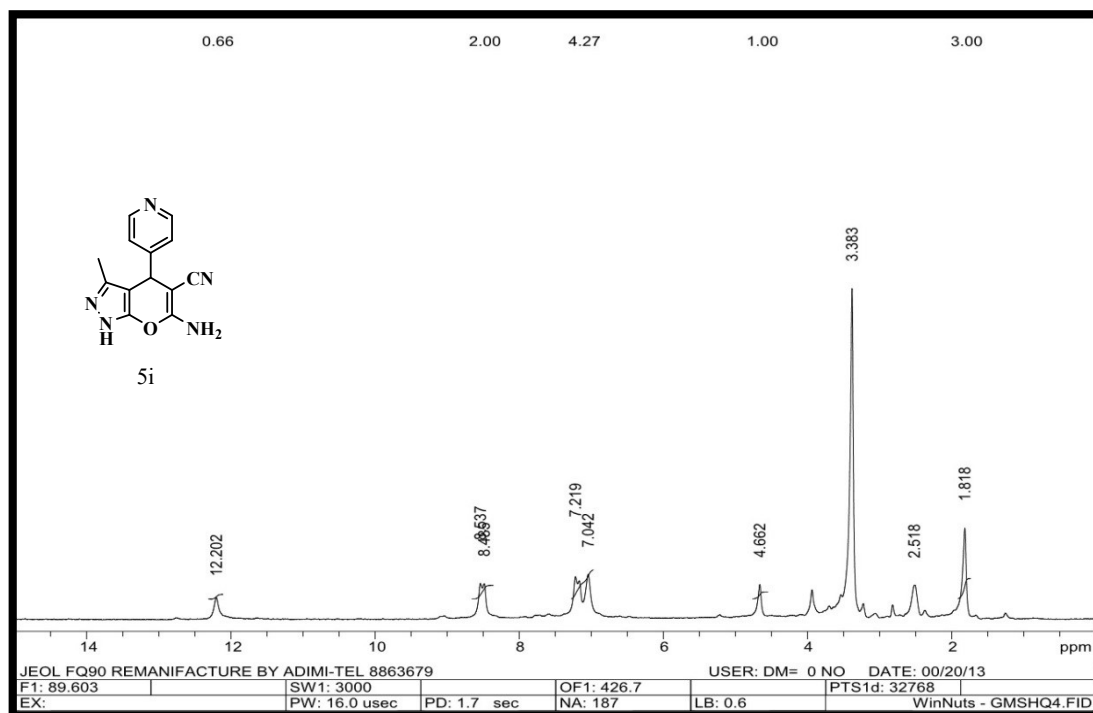

<sup>1</sup>H NMR spectra of compound 5i

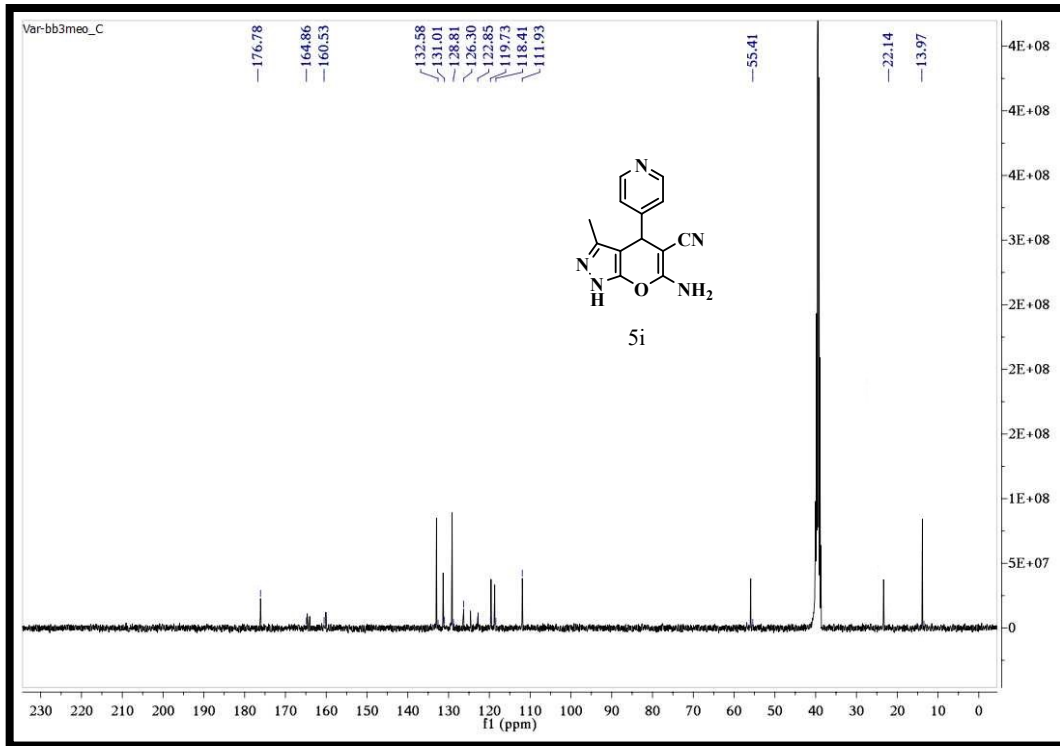

<sup>13</sup>CNMR spectra of compound 5i



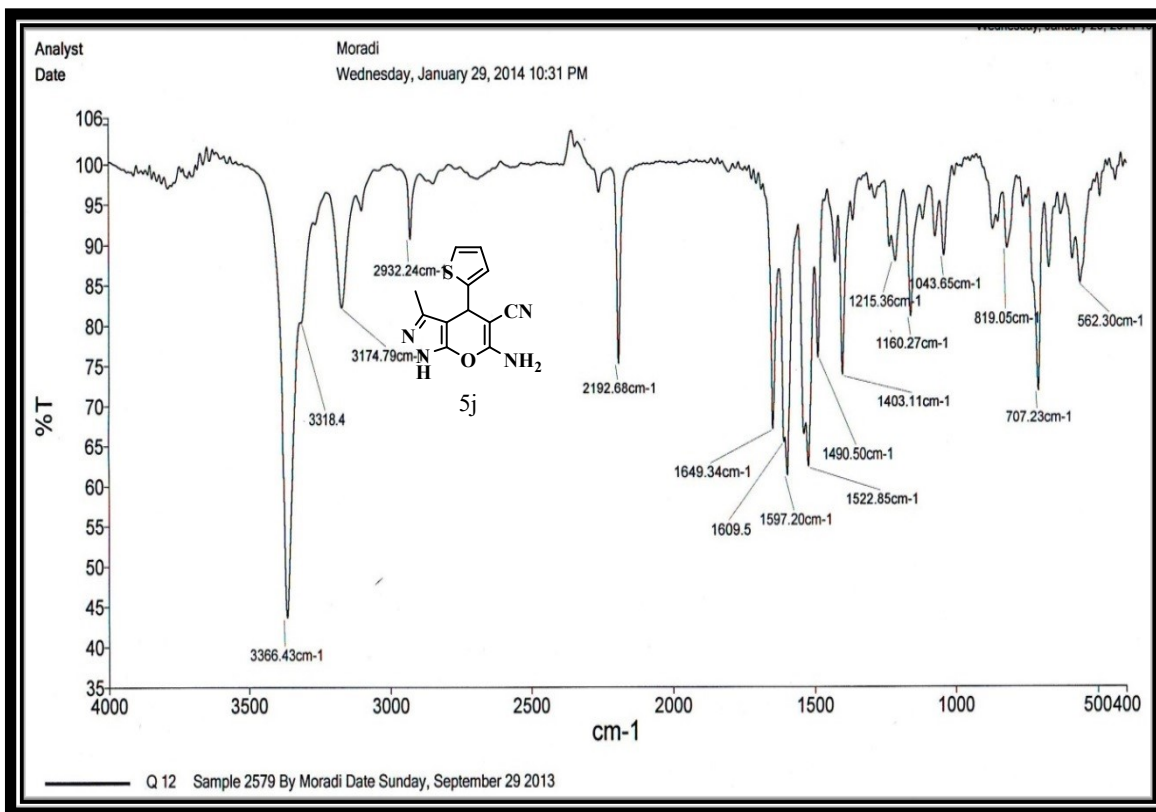

FT-IR spectra of compound 5j

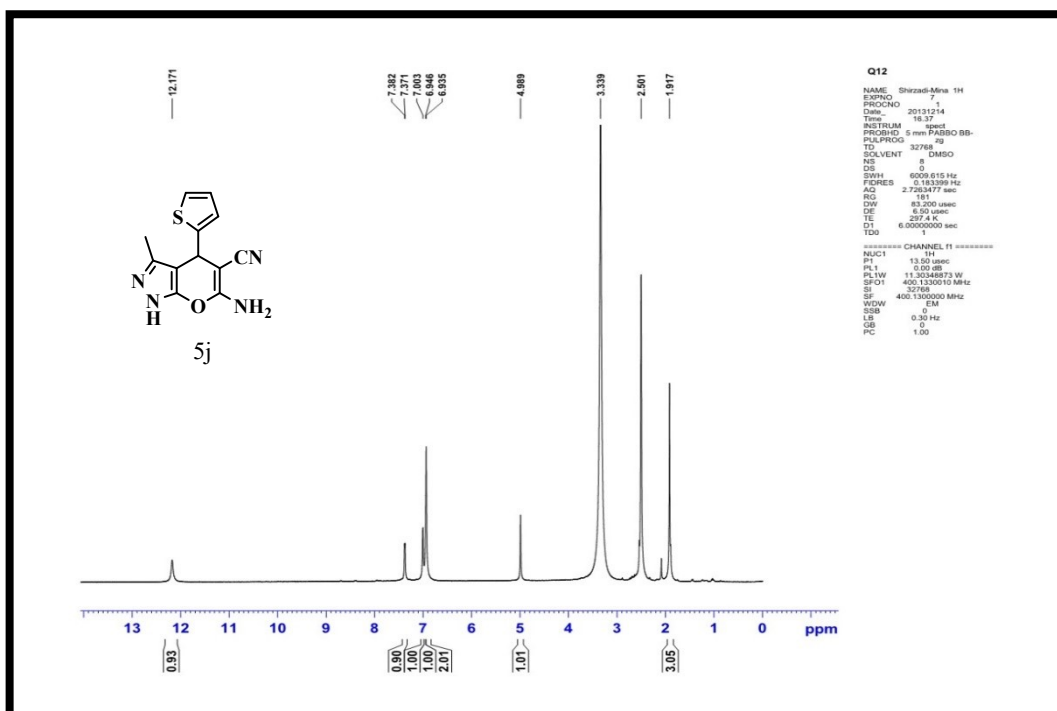

<sup>1</sup>H NMR spectra of compound 5j

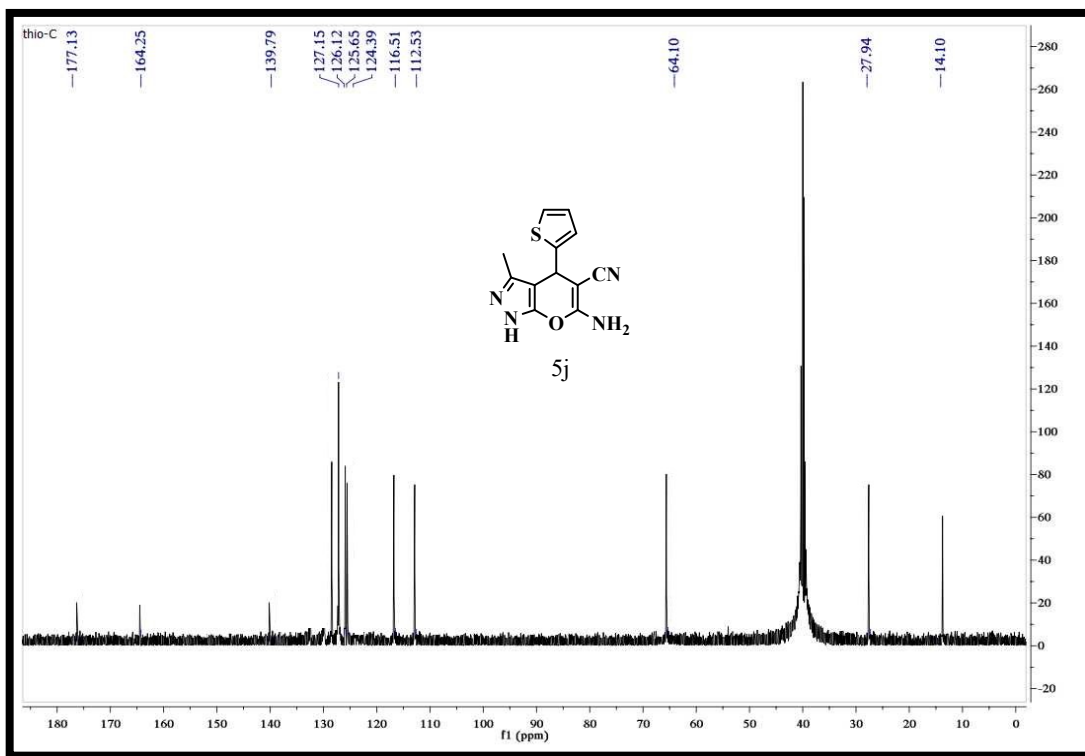

<sup>13</sup>CNMR spectra of compound 5j

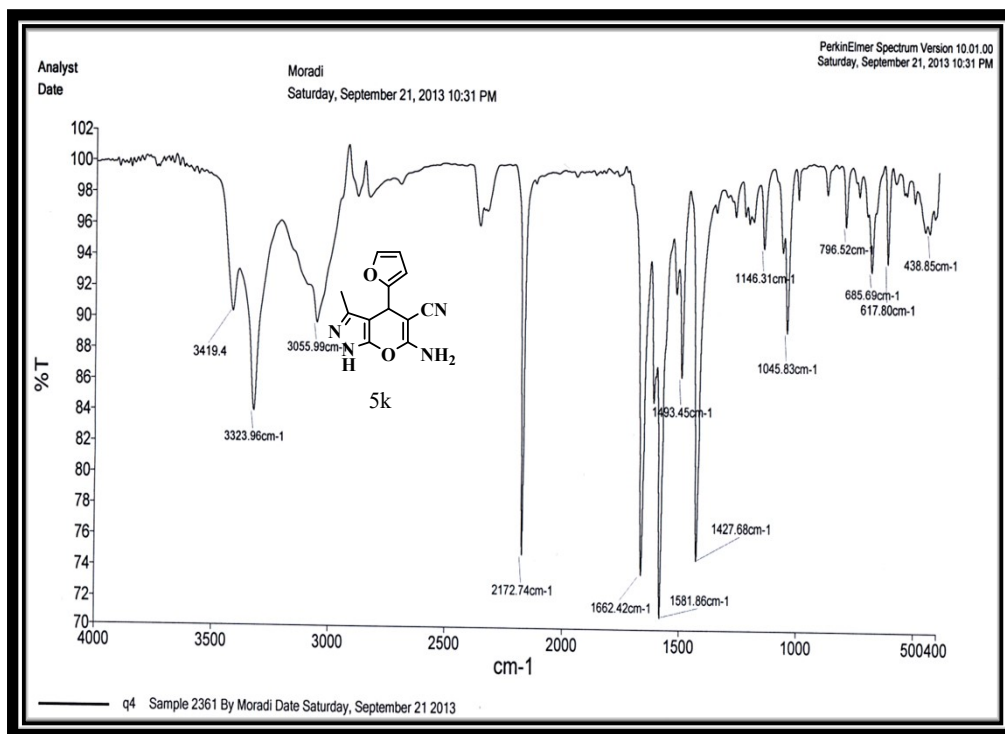

### FT-IR spectra of compound 5k

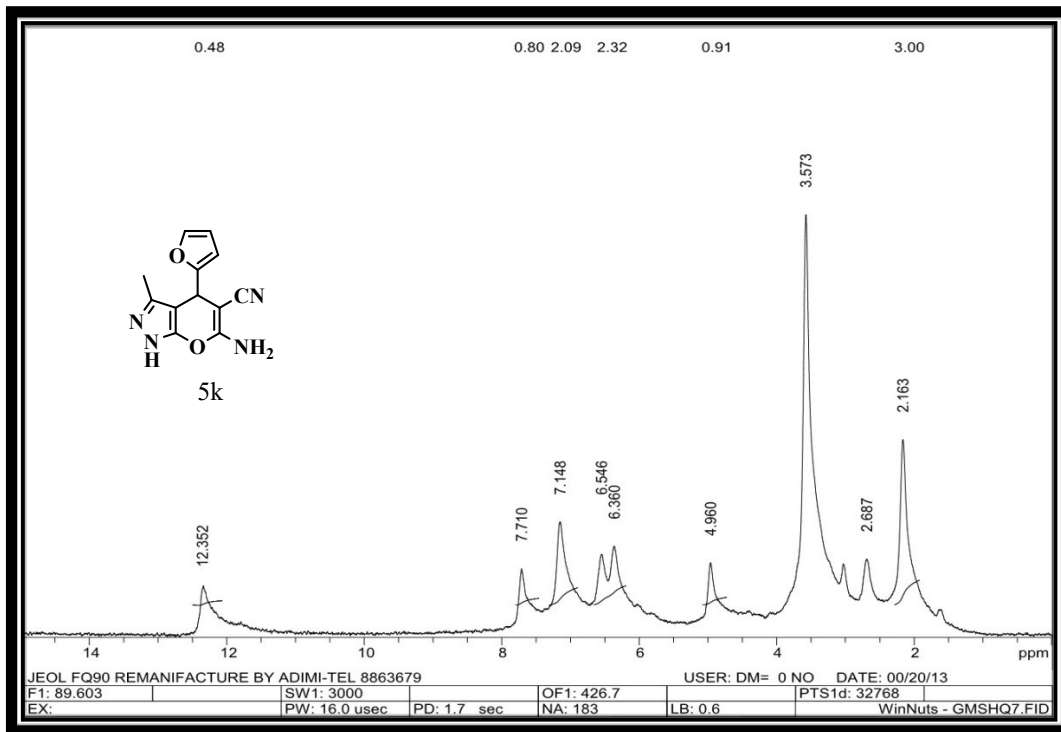

### <sup>13</sup>C NMR spectra of compound 5k

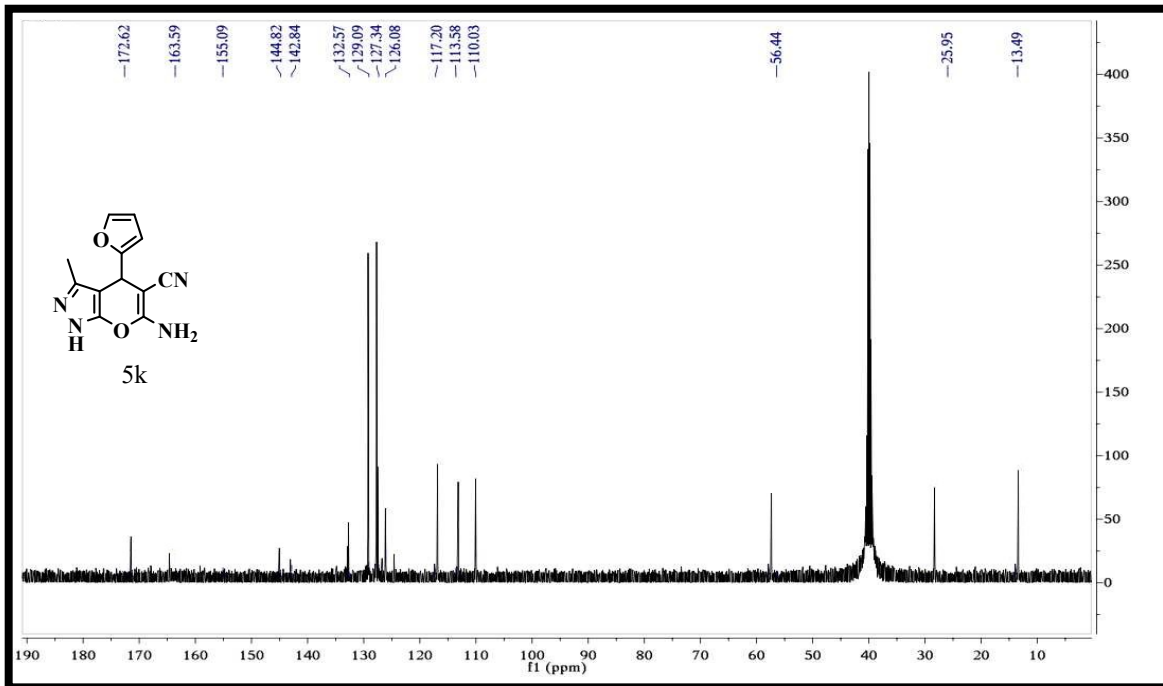

### <sup>13</sup>CNMR spectra of compound 5k

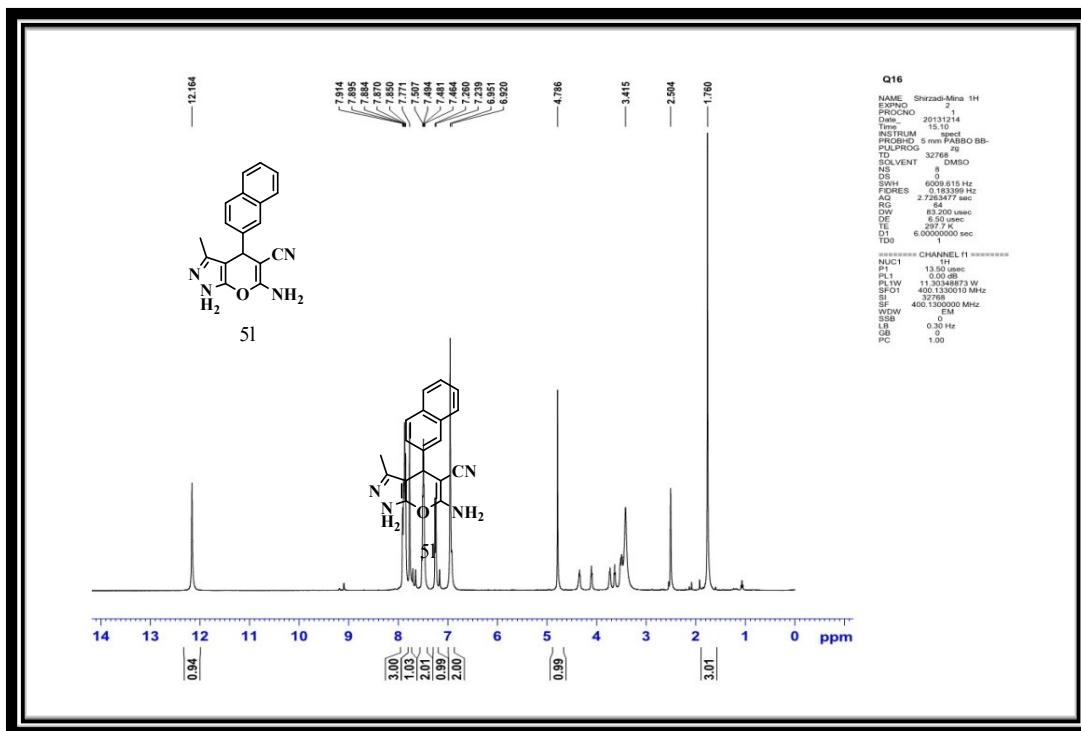

### <sup>1</sup>HNMR spectra of compound 5l

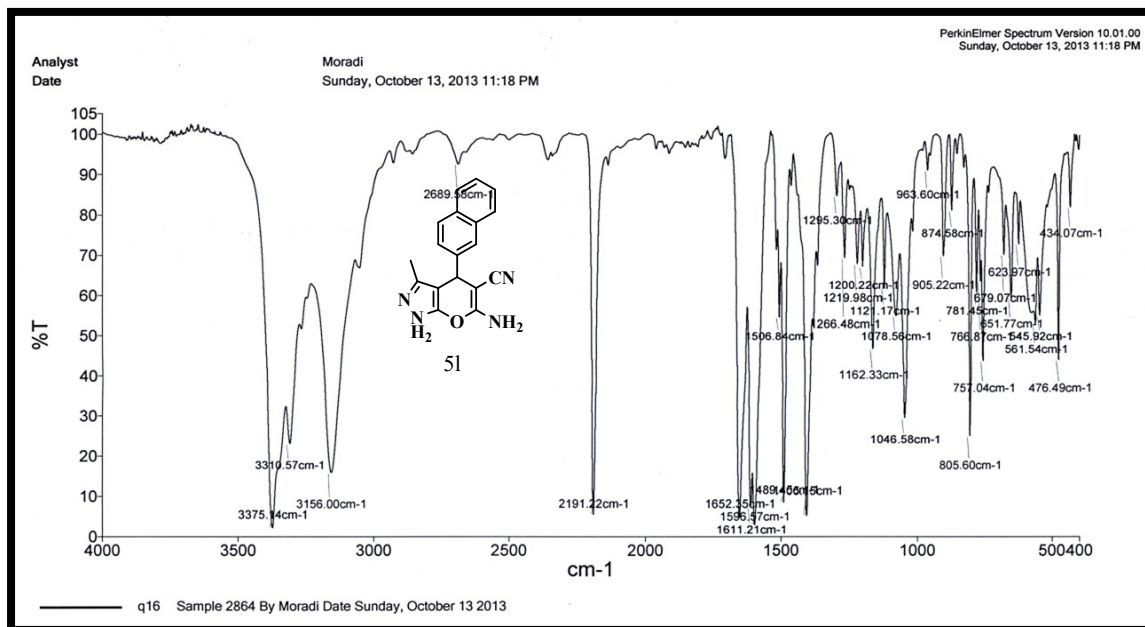

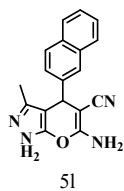

<sup>13</sup>CNMR spectra of compound 51

b

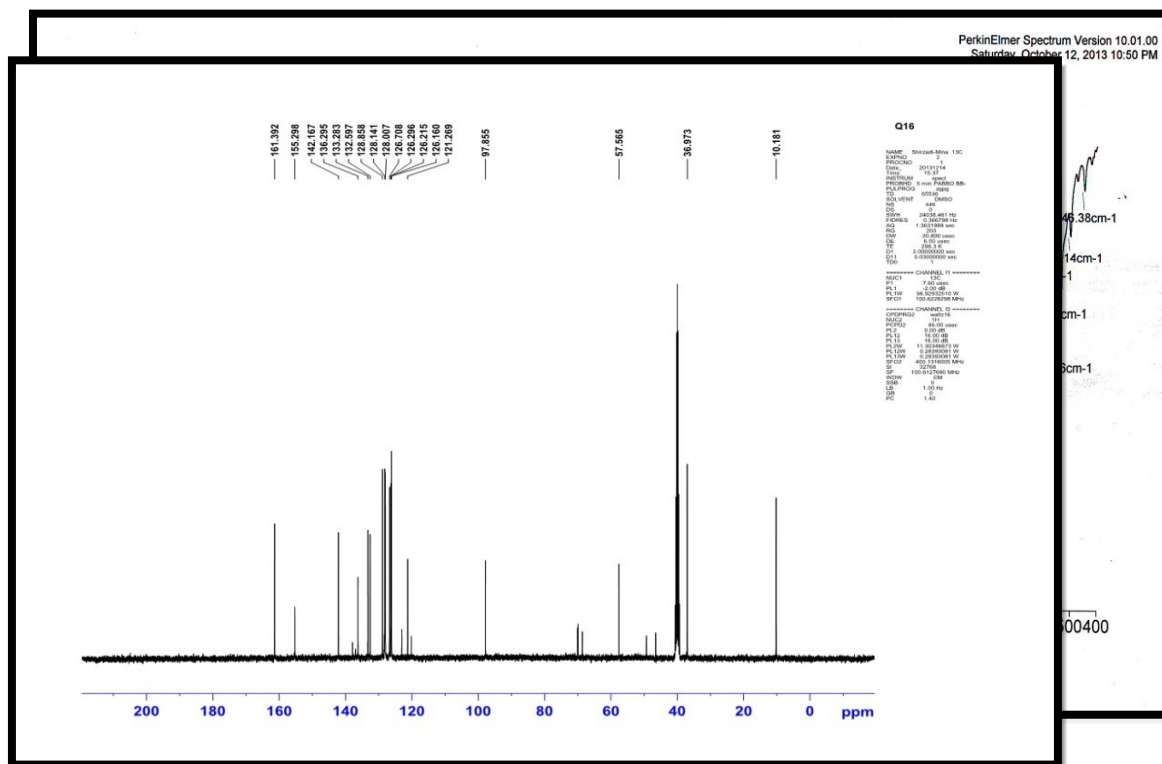

FTIR spectra of compound 5m

<sup>1</sup>HNMR spectra of compound 5m

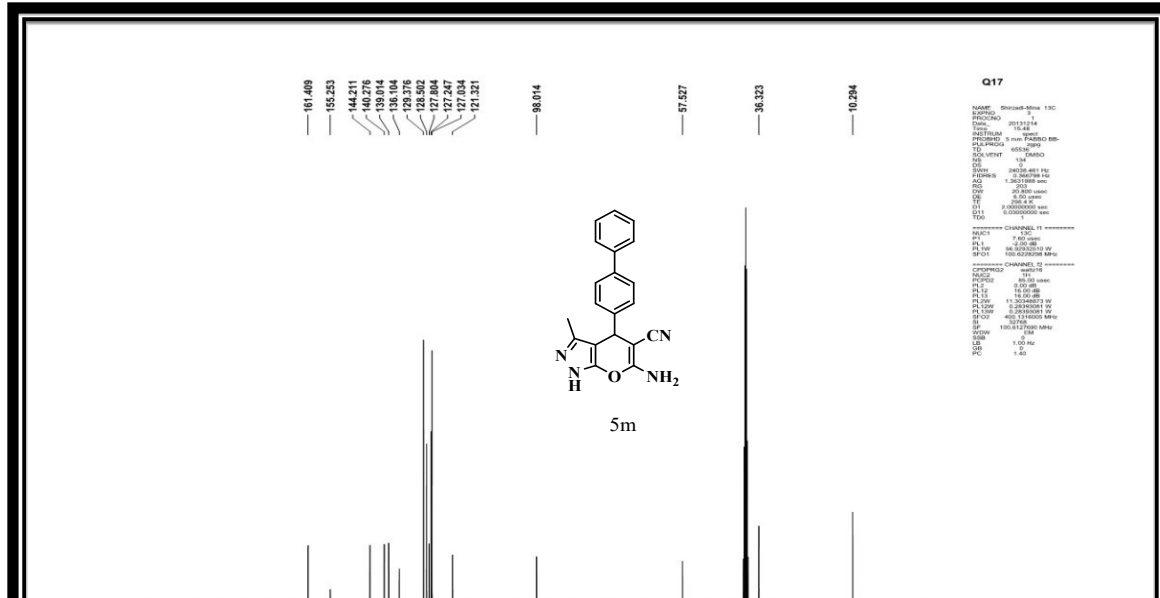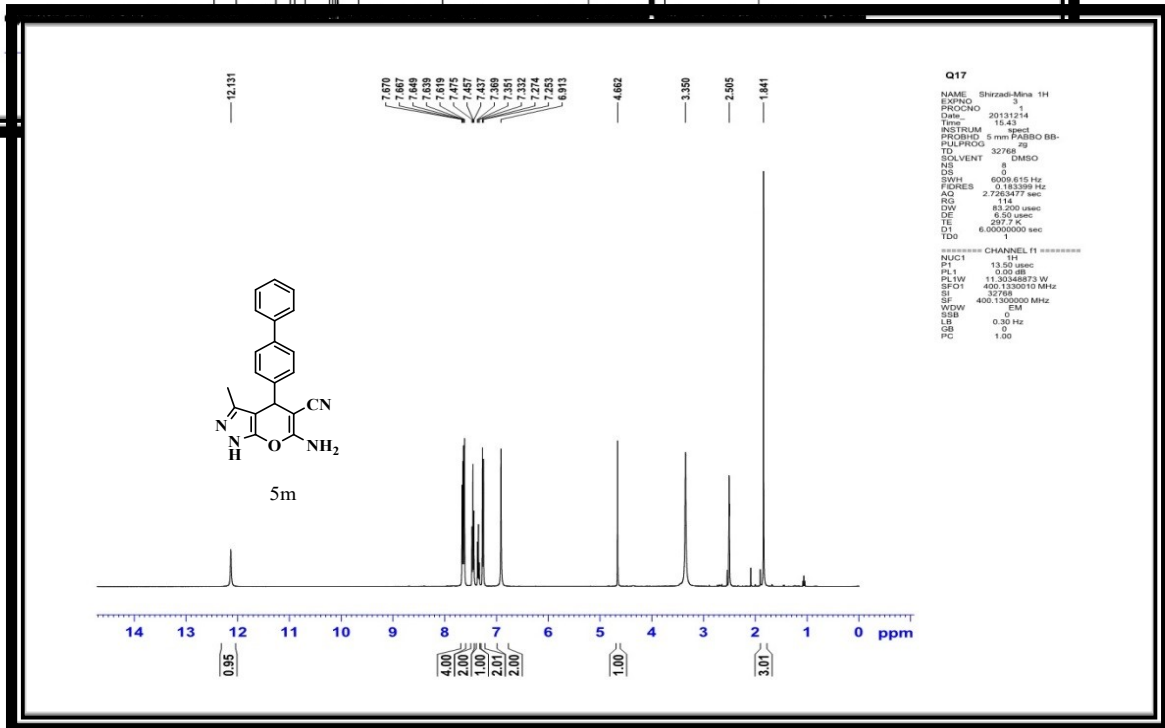

<sup>13</sup>CNMR spectra of compound 5m
